# Supplementary material for: Astrocytic accumulation of tau fibrils isolated from Alzheimer’s disease brains induces inflammation, cell-to-cell propagation and neuronal impairment
Source: Springer Nature journal article supplement (doi:10.1186/s40478-024-01745-8), 2024-02-26
Supplement: MOESM1 [file 26784448]

**Table. S1** List of all antibodies and dyes used in this study

| <b>Manufacturer</b>                            | <b>Antibody/Dye</b>                 | <b>Target</b>                        | <b>Dilution</b> |
|------------------------------------------------|-------------------------------------|--------------------------------------|-----------------|
| Sigma (P5282)                                  | Phalloidin                          | Actin                                | ICC 1:1000      |
| Abcam (ab20346)                                | VI-10                               | Vimentin                             | ICC 1:400       |
| Abcam (ab4648)                                 | Anti-GFAP                           | GFAP                                 | ICC 1:400       |
| Novus Biologicals<br>(NBP1-87102)              | S100B antibody                      | S100B                                | ICC 1:400       |
| Novus Biologicals<br>(NB100-1869)              | EAAT1/GLAST-<br>1/SLC1A3 Antibody   | GLAST/EAAT1                          | ICC 1:400       |
| Abcam (ab32127)                                | Anti-Synaptophysin                  | Synaptophysin                        | ICC 1:400       |
| Biolegend (801202)                             | TUBB3                               | Tubulin $\beta$ 3                    | ICC 1:400       |
| Ebba biotech                                   | Amytracker 680                      | Amyloid core of tau fibrils          | ICC 1:1000      |
| Thermo Fisher Scientific<br>(A-11001, A-21422) | AlexaFluor Goat anti-Ms<br>488, 555 | Mouse IgG                            | ICC 1:200       |
| Thermo Fisher Scientific<br>(A-11008, A-21245) | AlexaFluor Goat anti-Rb<br>488, 647 | Rabbit IgG                           | ICC 1:200       |
|                                                | AlexaFluor Goat anti-Ch<br>647      | Chicken IgY                          | ICC 1:200       |
| Thermo Fisher Scientific<br>(AHB0042)          | Tau-5                               | Total tau                            | WB 1:400        |
| Thermo Fisher Scientific<br>(MN1020)           | AT8                                 | Phosphorylated tau Ser202,<br>Thr205 | WB 1:400        |

|                                          |             |           |             |
|------------------------------------------|-------------|-----------|-------------|
| Thermo Fisher Scientific<br>(35518)      | Dylight 700 | Mouse IgG | WB 1:20 000 |
| Thermo Fisher Scientific<br>(Sa5-535521) | Dylight 800 | Mouse IgG | WB 1:20 000 |
