# Supplementary material for: Astrocytic accumulation of tau fibrils isolated from Alzheimer’s disease brains induces inflammation, cell-to-cell propagation and neuronal impairment
Source: Springer Nature journal article supplement (doi:10.1186/s40478-024-01745-8), 2024-02-26
Supplement: MOESM2 [file 26784448]

```
/*
```

## QUANTIFICATION OF TOTAL NUMBER OF BRANCHING POINTS

All threshold values (min and max) were set manually for each experiment and subsequently applied to all images.

```
/*
```

```
//Automation
```

```
inputfile = "C:\\Input\\";
```

```
outputfile = "C:\\Output\\";
```

```
list = getFileList(inputfile);
```

```
setBatchMode(true);
```

```
for (i=0; i<list.length; i++) {
```

```
showProgress(i+1, list.length);
```

```
open(inputfile+list[i]);
```

```
//Clear ROIs
```

```
run("Options...", "iterations=1 count=1 black do=Nothing");
```

```
roiManager("reset");
```

```
//Make 2x images to find edges
```

```
//Setting threshold and removing particles
```

```
run("Options...", "iterations=1 count=1 black edm=8-bit do=Nothing");
```

```
run("Duplicate...", " ");
```

```
run("8-bit");
```

```
rename("threshold");
```

```
run("Duplicate...", " ");
```

```
rename("edge");
```

```
run("Find Edges");
```

```
setAutoThreshold("Triangle dark");
run("Convert to Mask");
run("Grays");
setOption("BlackBackground", false);
setThreshold(255,255);
run("Analyze Particles...", "size=75-Infinity pixel show=Masks");
run("Grays");
rename("edge.particles");
```

//Blur image and remove particles

```
selectImage("threshold");
run("Gaussian Blur...", "sigma=0.8");
setAutoThreshold("Mean dark");
setThreshold(5, 255);
run("Convert to Mask");
run("Analyze Particles...", "size=75-Infinity pixel show=Masks");
run("Grays");
rename("threshold.particles");
```

//Skeletonize the cell and dilate/erode to size

```
run("Skeletonize (2D/3D)");
run("Create Selection");
roiManager("Add");
roiManager("select", 0);
run("Options...", "iterations=15 count=1 black edm=8-bit do=Dilate");
run("Options...", "iterations=15 count=2 black edm=8-bit do=Erode");
run("Skeletonize (2D/3D)");
rename("Skeleton");
run("Create Selection");
roiManager("Add");
```

```
//Count number of intersections
```

```
run("Convolve...", "text1=[1 1 1\n1 247 1\n1 1 1\n] normalize");
```

```
setThreshold(250,255);
```

```
run("Create Selection");
```

```
setSelectionName("Branchpoints");
```

```
roiManager("add");
```

```
run("Analyze Particles...", "size=1-Infinity pixel show=Masks display summarize add");
```

```
run("Close All");
```

```
}
```

```
/*
```

## QUANTIFICATION OF THE NUMBER OF BRANCHING POINTS IN THE SOMA

```
/*
```

```
//Automation
```

```
inputfile = "C:\\Input\\";
```

```
outputfile = "C:\\Output\\";
```

```
list = getFileList(inputfile);
```

```
setBatchMode(true);
```

```
for (i=0; i<list.length; i++) {
```

```
    showProgress(i+1, list.length);
```

```
    open(inputfile+list[i]);
```

```
//Clear ROIs
```

```
run("Options...", "iterations=1 count=1 black do=Nothing");
```

```
roiManager("reset");
```

```
//Make 2x images to find edges
```

```
//Setting threshold and removing particles
```

```
run("Options...", "iterations=1 count=1 black edm=8-bit do=Nothing");
```

```
run("Duplicate...", " ");
```

```
run("8-bit");
```

```
rename("threshold");
```

```
run("Duplicate...", " ");
```

```
rename("edge");
```

```
run("Find Edges");
```

```
setAutoThreshold("Triangle dark");
```

```
run("Convert to Mask");
run("Grays");
setOption("BlackBackground", false);
setThreshold(255,255);
run("Analyze Particles...", "size=75-Infinity pixel show=Masks");
run("Grays");
rename("edge.particles");
```

```
//Blur image and remove particles
```

```
selectImage("threshold");
run("Gaussian Blur...", "sigma=0.8");
setAutoThreshold("Mean dark");
setThreshold(5, 255);
run("Convert to Mask");
run("Analyze Particles...", "size=75-Infinity pixel show=Masks");
run("Grays");
rename("threshold.particles");
```

```
//Skeletonize the cell and dilate/erode to size
```

```
run("Skeletonize (2D/3D)");
run("Create Selection");
roiManager("Add");
roiManager("select", 0);

run("Options...", "iterations=15 count=1 black edm=8-bit do=Dilate");
run("Options...", "iterations=15 count=2 black edm=8-bit do=Erode");

run("Skeletonize (2D/3D)");
rename("Skeleton");
run("Create Selection");
```

```
roiManager("Add");
```

```
//Removal of branchpoints in soma
```

```
selectImage("threshold");
```

```
run("Grays");
```

```
run("Distance Map");
```

```
setThreshold(15,255);
```

```
run("Create Selection");
```

```
roiManager("add");
```

```
selectImage("Skeleton");
```

```
roiManager("select", 2);
```

```
run("Clear Outside");
```

```
//Count number of intersections
```

```
run("Convolve...", "text1=[1 1 1\n1 247 1\n1 1 1\n] normalize");
```

```
setThreshold(250,255);
```

```
run("Create Selection");
```

```
setSelectionName("Branchpoints");
```

```
roiManager("add");
```

```
run("Analyze Particles...", "size=1-Infinity pixel show=Masks display summarize add");
```

```
run("Close All");
```

```
}
```

/\*

To calculate the number of distant branching points, use the following formula:

**NUMBER OF DISTANT BRANCHING POINTS=**

**TOTAL NUMBER OF BRANCHING POINTS - NUMBER OF BRANCHING POINTS IN THE SOMA**

/\*
