# Supplementary material for: Astrocytic accumulation of tau fibrils isolated from Alzheimer’s disease brains induces inflammation, cell-to-cell propagation and neuronal impairment
Source: Springer Nature journal article supplement (doi:10.1186/s40478-024-01745-8), 2024-02-26
Supplement: MOESM6 [file 26784448]

**a**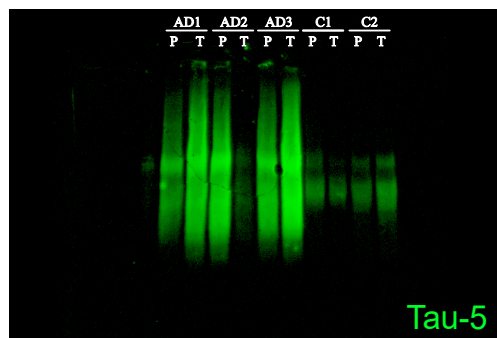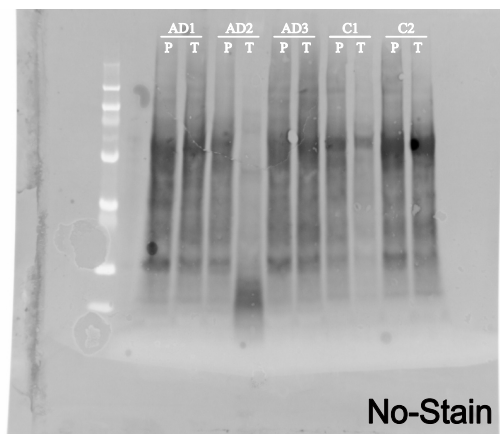**b**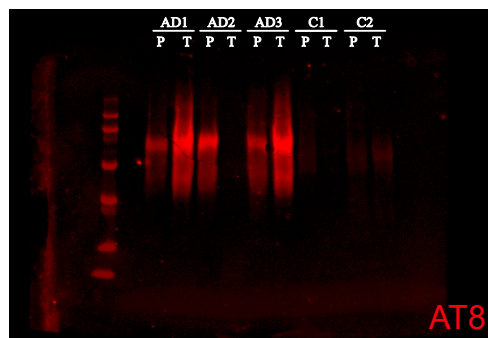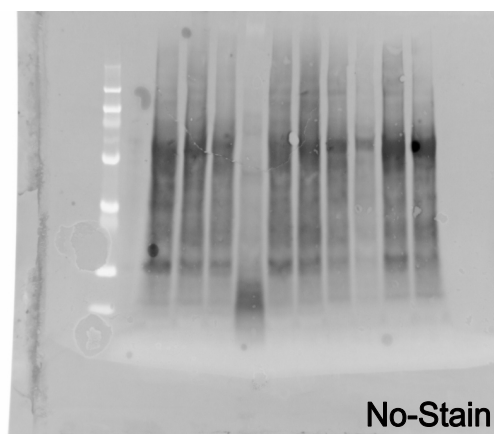**c**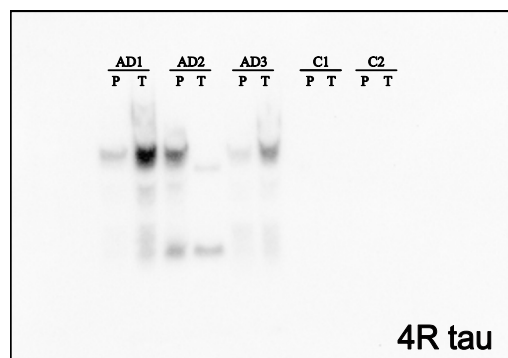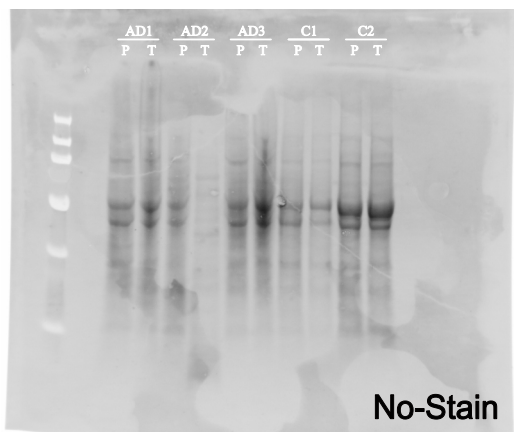**d**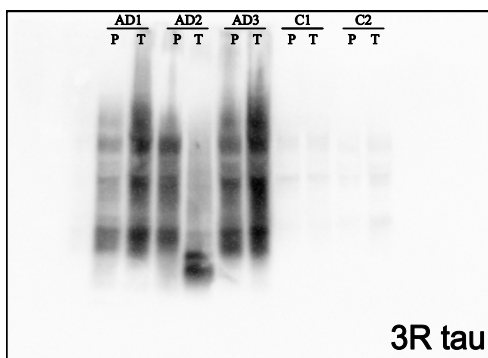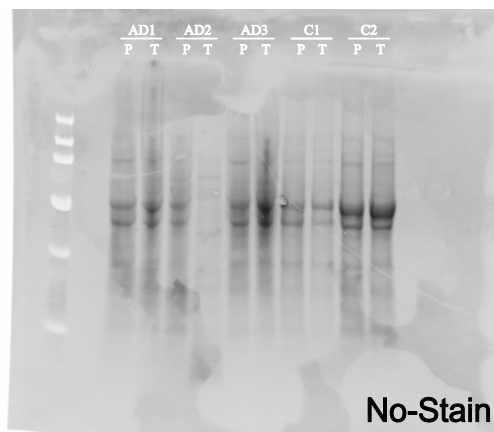

**Online Resource 6** Full western blots and total protein (No-Stain) blots used to measure **(a)** total tau, **(b)** phosphorylated tau, **(c)** 4R tau and **(d)** 3R tau concentrations in brain tissue extracts. P= parietal. T=temporal.
