# Supplementary material for: Astrocytic accumulation of tau fibrils isolated from Alzheimer’s disease brains induces inflammation, cell-to-cell propagation and neuronal impairment
Source: Springer Nature journal article supplement (doi:10.1186/s40478-024-01745-8), 2024-02-26
Supplement: MOESM7 [file 26784448]

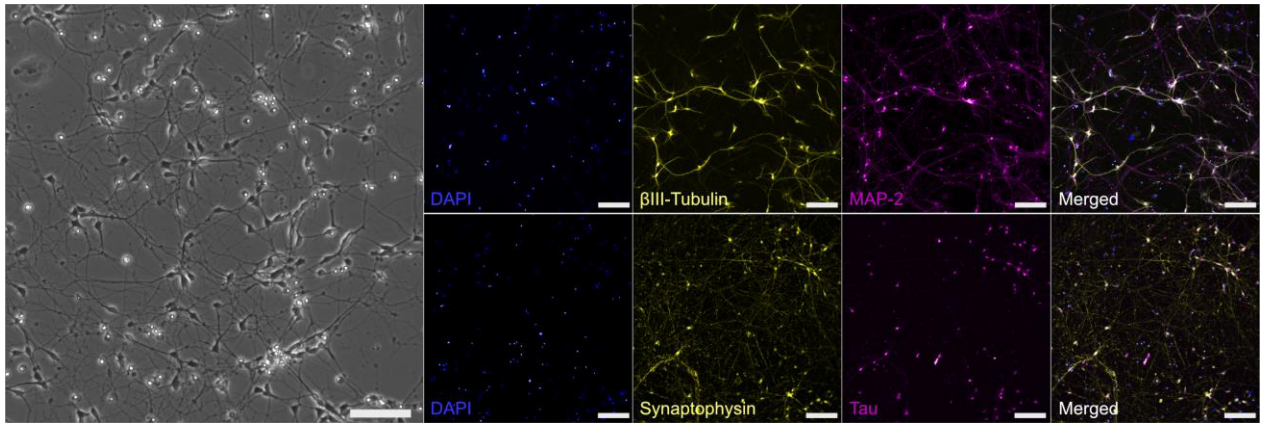

**Online Resource 13** Human iPSC derived neurons express cell type-specific markers. Scale bar= 100  $\mu$ m
