# Supplementary material for: Astrocytic accumulation of tau fibrils isolated from Alzheimer’s disease brains induces inflammation, cell-to-cell propagation and neuronal impairment
Source: Springer Nature journal article supplement (doi:10.1186/s40478-024-01745-8), 2024-02-26
Supplement: MOESM9 [file 26784448]

**a**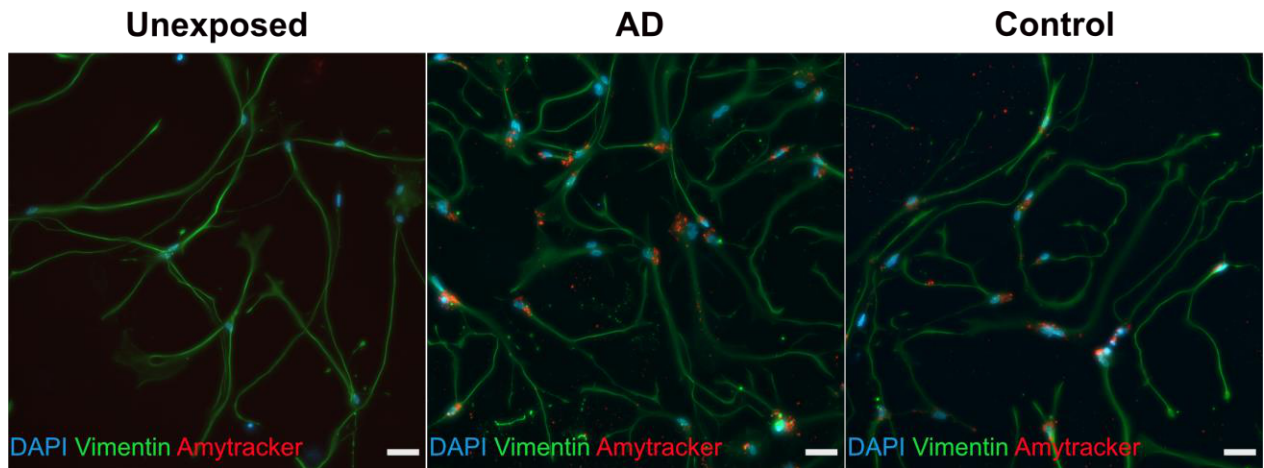**b**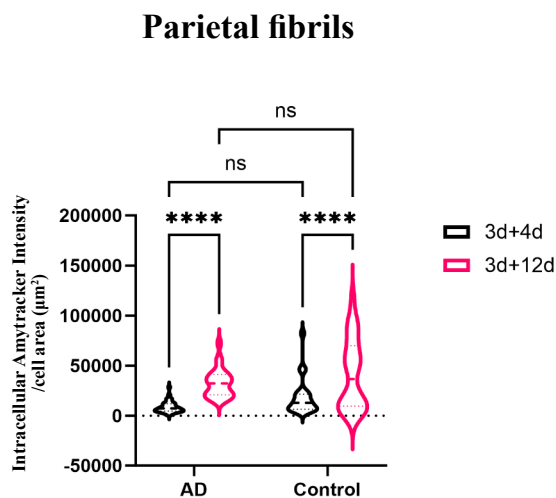**c**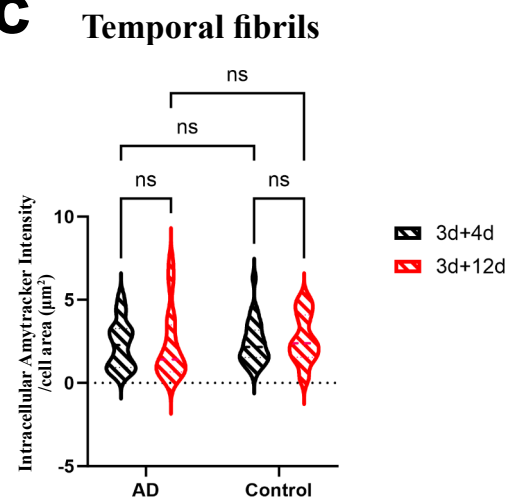

**Online Resource 8 (a)** Fluorescent images of Amytracker-stained astrocyte cultures demonstrating uptake of brain-derived AD and control tau fibrils by human astrocytes. No Amytracker signal was detected in unexposed astrocytes, excluding any endogenous formation of tau fibrils. Scale bar= 50 µm. **(b)** Quantification of intracellular Amytracker-680 signal in astrocytes exposed to parietal tau fibrils. **(c)** Quantification of intracellular Amytracker-680 signal in astrocytes exposed to temporal tau fibrils. Three AD and two control samples were used. N= 3 culture experiments, n= 10-12 non-overlapping fields per brain sample. Signal intensities in **b** and **c** were normalized to cell area (µm<sup>2</sup>). The level of significance was set at \*p ≤ 0.05, \*\*p ≤ 0.001, \*\*\*p ≤ 0.0001, \*\*\*\*p ≤ 0.00001
