# Supplementary material for: Astrocytic accumulation of tau fibrils isolated from Alzheimer’s disease brains induces inflammation, cell-to-cell propagation and neuronal impairment
Source: Springer Nature journal article supplement (doi:10.1186/s40478-024-01745-8), 2024-02-26
Supplement: MOESM10 [file 26784448]

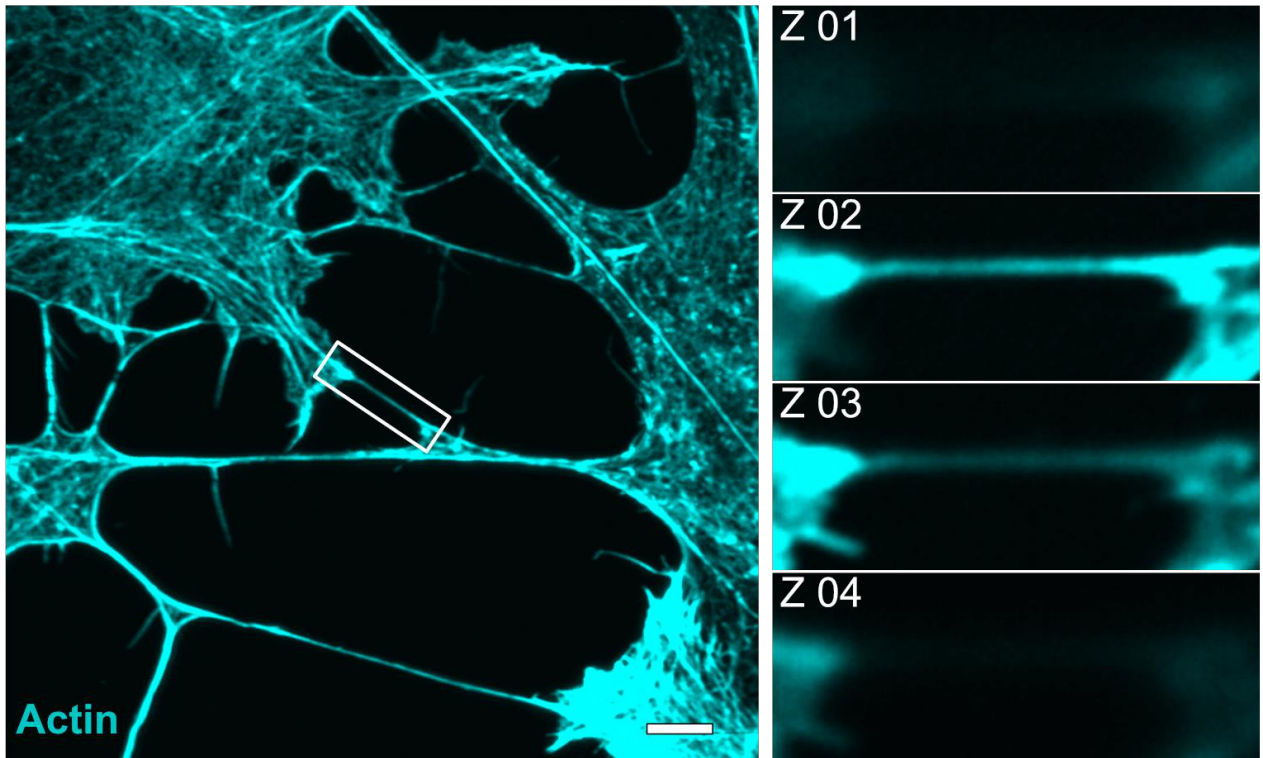

**Online Resource 9** Confocal imaging of phalloidin-stained human astrocytes demonstrating tunneling nanotube (TNT) formation between two astrocytes. The different layers (Z 01-Z 04) of the Z-stack (of the white rectangle) are shown to the right. Scale bar= 5  $\mu\text{m}$
