# Supplementary material for: Astrocytic accumulation of tau fibrils isolated from Alzheimer’s disease brains induces inflammation, cell-to-cell propagation and neuronal impairment
Source: Springer Nature journal article supplement (doi:10.1186/s40478-024-01745-8), 2024-02-26
Supplement: MOESM12 [file 26784448]

15:30

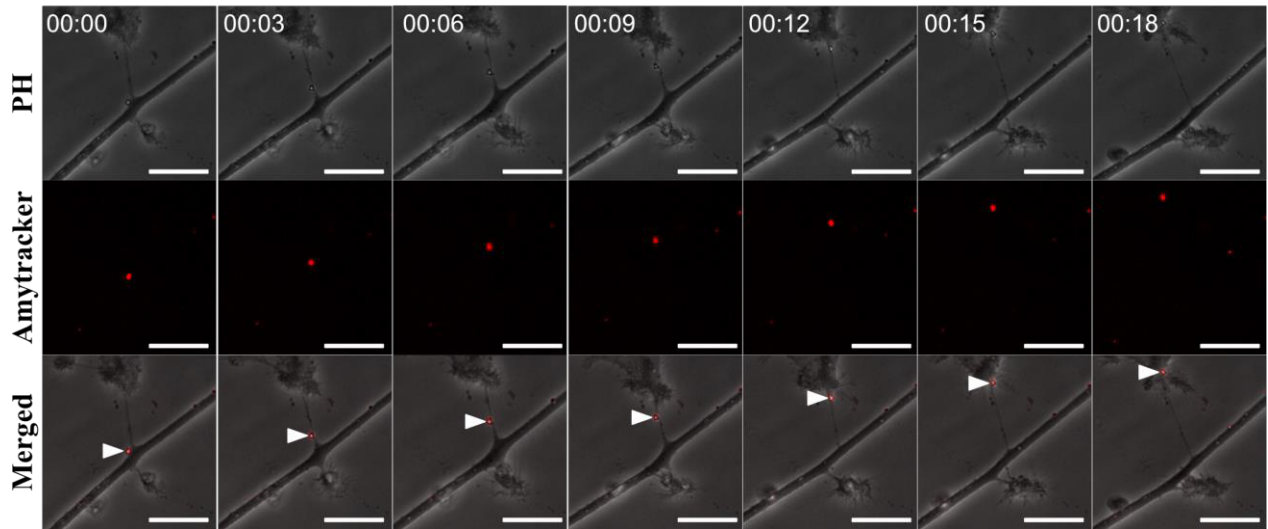

**Online Resource 11** Brain derived AD tau fibrils are transferred between human astrocytes through tunneling nanotubes. Amytracker-labelled tau fibrils (arrowhead) travelling between two neighboring astrocytes. Images were captured with a 3-minutes interval. Scale bar= 25  $\mu$ m
