# Supplementary material for: Astrocytic accumulation of tau fibrils isolated from Alzheimer’s disease brains induces inflammation, cell-to-cell propagation and neuronal impairment
Source: Springer Nature journal article supplement (doi:10.1186/s40478-024-01745-8), 2024-02-26
Supplement: MOESM13 [file 26784448]

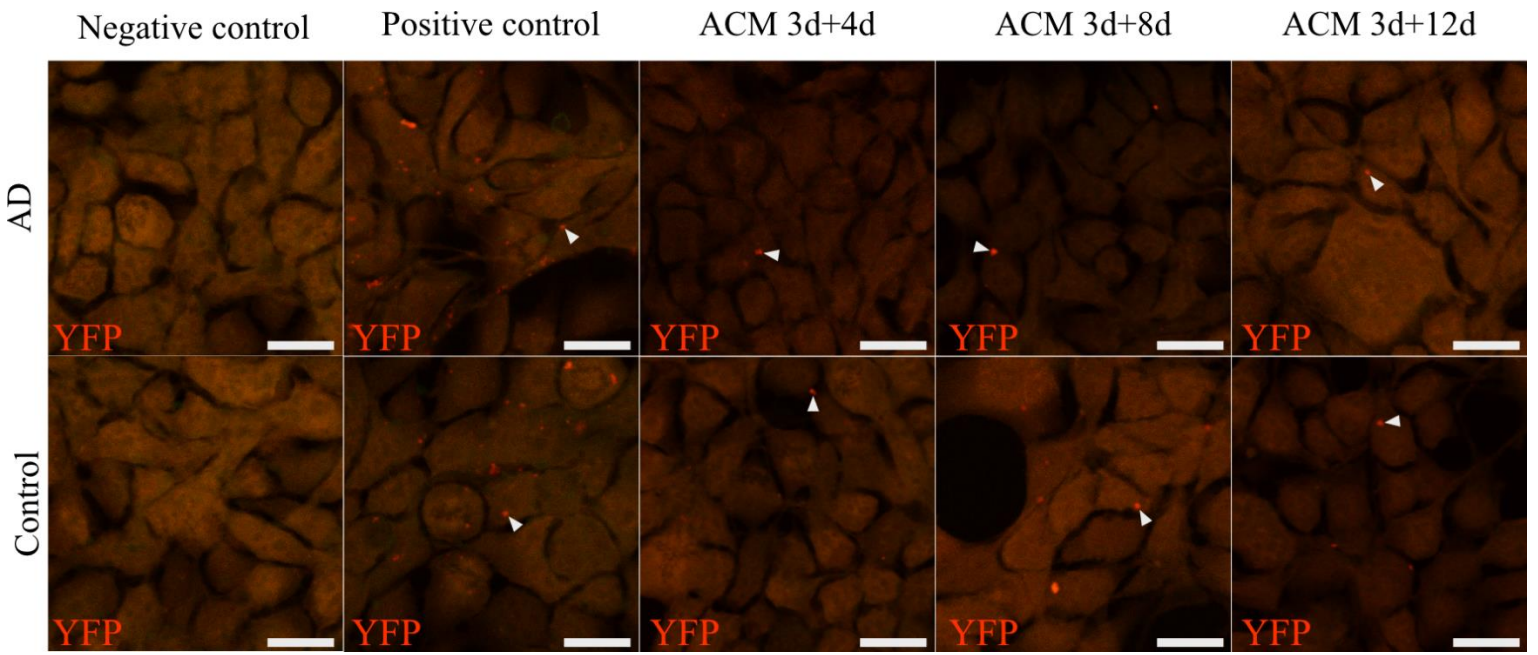

**Online Resource 12** Representative confocal images of ACM-exposed biosensor HEK cells. Arrowheads indicate examples of positive FRET signal. Scale bar = 20  $\mu\text{m}$ .
